# Supplementary material for: Carbapenem-Resistant NDM and OXA-48-like Producing K. pneumoniae: From Menacing Superbug to a Mundane Bacteria; A Retrospective Study in a Romanian Tertiary Hospital
Source: MDPI journal article supplement (doi:10.3390/antibiotics13050435), 2024-05-12
Supplement: s1 [file s1]

## Supplementary material

**Figure S1. Resistance pattern (%)**

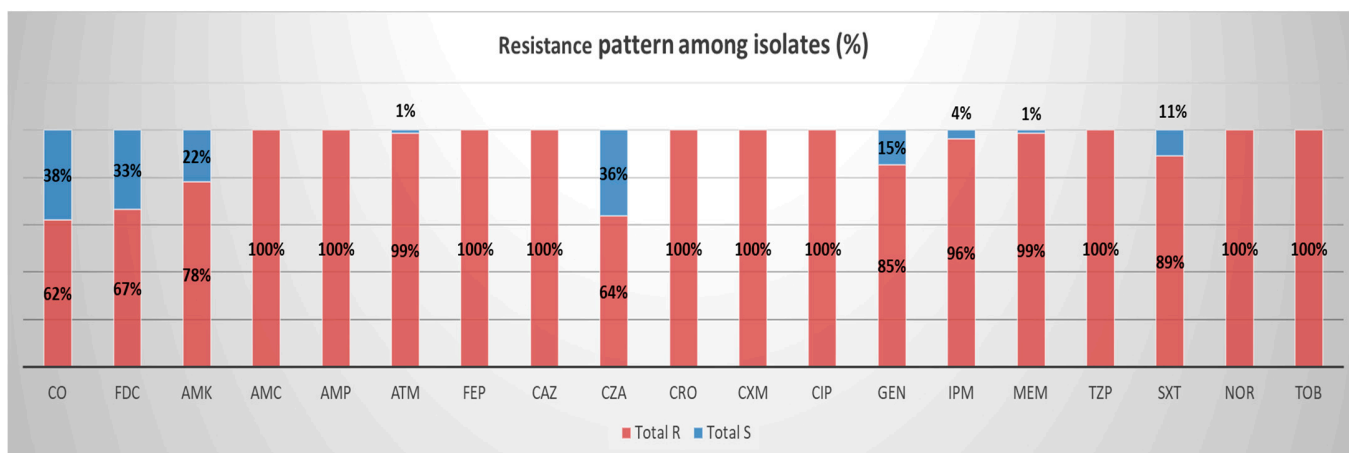

**Figure S2. Resistance pattern only for NDM+OXA-48-like(%)**

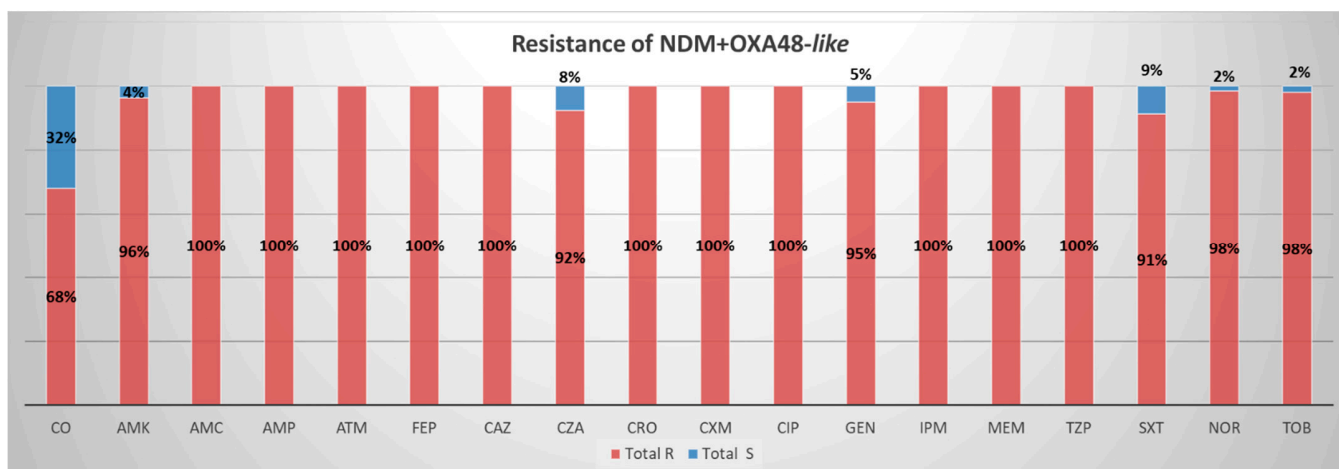

### Abbreviations:

Total S= total sensibilities, Total R= total resistance

CO - Colistin

FDC - Cefiderocol

AMK - Amikacin

AMC - Amoxicillin - Clavulanic Acid

AMP - Ampicillin

ATM - Aztreonam

TOB - Tobramycin

FEP - Cefepime

CAZ - Ceftazidime

CZA - Ceftazidime - Avibactam

CRO - Ceftriaxone

CXM - Cefuroxime Axetil

CIP - Ciprofloxacin

GEN - Gentamicin

IPM - Imipenem

MEM - Meropenem

TZP - Piperacillin - tazobactam

SXT - Trimethoprim - Sulfamethoxazole

NOR - Norfloxacin

**Table S3. Past hospitalization and distribution of cabapenemases**

| Carbapenemase type       |           | OXA-48<br>n=34 | NDM<br>n=16 | KPC<br>n=23 | NDM+OXA-48-like<br>n=48 | Total<br>n=162 |
|--------------------------|-----------|----------------|-------------|-------------|-------------------------|----------------|
| Previous hospitalization | No, n(%)  | 3(8.8)         | 3(18.8)     | 9(28.1)     | 16(20.0)                | 31(19.1)       |
|                          | Yes, n(%) | 31(91.2)       | 13(81.3)    | 23(71.9)    | 64(80.0)                | 131(80.9)      |

**Table S4. Comparison of specialties and carbapenemases distribution**

| Carbapenemase type                         |                     | OXA-48<br>n=31 | NDM<br>n=13 | KPC<br>n=23 | NDM+OXA-48-like<br>n=64 | Total<br>n=131 |
|--------------------------------------------|---------------------|----------------|-------------|-------------|-------------------------|----------------|
| Admission in different medical specialties | Surgery wards, n(%) | 10(32.3)       | 6(46.2)     | 6(26.1)     | 18(28.1)                | 40(30.5)       |
|                                            | Medical wards, n(%) | 21(67.7)       | 7(53.8)     | 17(73.9)    | 46(71.9)                | 91(69.5)       |

**Table S5. Carbapenem regimen**

| Carbapenem based regimen    | All<br>n=75(%) | Recovered<br>n=32<br>(%) | Deceased<br>n=18<br>(%) | NDM+<br>OXA-48-like<br>n=46<br>(%) | Recovered<br>NDM+<br>OXA-48-like<br>n=22<br>(%) | Deceased NDM<br>+OXA-48-like<br>n=12<br>(%) |
|-----------------------------|----------------|--------------------------|-------------------------|------------------------------------|-------------------------------------------------|---------------------------------------------|
| Monotherapy (meropenem)     | 17(22.3)       | 5(15.6)                  | 3(16.7)                 | 7(15.2)                            | 4(18.1)                                         | 2(16.6)                                     |
| Combinations of antibiotics | 58(77.3)       | 27(84.38)                | 15(83.3)                | 39(84.7)                           | 18(81.8)                                        | 10(83.3)                                    |
| Carbapenem spared regimen   | n=76(%)        | n=30(%)                  | n=25(%)                 | n=31(%)                            | n=11(%)                                         | n=12(%)                                     |
| Monotherapies               | 45(59.2)       | 17(56.6)                 | 16(64.0)                | 11(35.4)                           | 2(18.1)                                         | 5(41.6)                                     |
| Combinations of antibiotics | 31(40.8)       | 13(43.3)                 | 9(36.0)                 | 20(64.5)                           | 9(81.8)                                         | 7(58.3)                                     |

Table S6. Colistin based regimen

| Colistin based regimen (n=76)  | All n=7 (%) | Cured n=27 (%) | Deceased n=32 (%) | NDM+ OXA-48-like n=45 (%) | Cured NDM+ OXA-48-like n=18 (%) | Deceased NDM +OXA-48-like n=16 (%) |
|--------------------------------|-------------|----------------|-------------------|---------------------------|---------------------------------|------------------------------------|
| Monotherapy                    | 15(19.0)    | 4(14.8)        | 8(25.0)           | 6(13.0)                   | 1(5.0)                          | 2(12.5)                            |
| Combinations of antibiotics    | 16(80.0)    | 23(85.0)       | 24(75)            | 39(86.6)                  | 17(95.0)                        | 14(87.5)                           |
| Colistin spared regimen (n=75) | n=77(%)     | n=34(%)        | n=16(%)           | n=32(%)                   | n=14(%)                         | n=23(%)                            |
| Monotherapy                    | 47(61.0)    | 19(55.0)       | 12(75.0)          | 12(37.5)                  | 5(35.7)                         | 5(21.7)                            |
| Combinations of antibiotics    | 30(38.0)    | 15(44.1)       | 4(25.0)           | 20(62.5)                  | 9(64.2)                         | 4(17.3)                            |

Table S7. Bivariate analysis of factors associated with patient's outcomes

| variable            | Survivor n=108 | Not-survivor n=48 | RR (%CI)                 | p-value           |
|---------------------|----------------|-------------------|--------------------------|-------------------|
| Age, average (S.D.) | 66.19(15.73)   | 70.96(13.18)      | -                        | 0.069             |
| Gender              |                |                   |                          | 0.058             |
| F                   | 41(63.1)       | 24(36.9)          | -                        |                   |
| M                   | 67(73.6)       | 24(26.4)          | -                        |                   |
| Disease Severity    |                |                   |                          | <b>0.014</b>      |
| mild                | 15(93.8)       | 1(6.3)            | reference                | -                 |
| moderate            | 76(70.4)       | 32(29.6)          | 4.74 (0.69-32.33)        | 0.112             |
| severe/critical     | 17(53.1)       | 15(46.9)          | <b>7.50 (1.08-51.84)</b> | <b>0.0411</b>     |
| ICU_admission       |                |                   |                          | <b>&lt;0.0001</b> |
| no                  | 95(79.4)       | 26(20.6)          | reference                | -                 |
| yes                 | 13(34.2)       | 22(65.8)          | 2.92 (1.91-4.47)         | <b>&lt;0.0001</b> |
| Sample type         |                |                   |                          | <b>0.001</b>      |
| other               | 37(55.2)       | 30(44.8)          | reference                | -                 |
| urinary             | 71(79.8)       | 18(20.2)          | 0.45(0.28-0.72)          | <b>0.0011</b>     |
| Carbapenemase_type  |                |                   |                          | 0.991             |
| OXA-48              | 21(70.0)       | 9(30.0)           | -                        |                   |
| NDM                 | 10(66.7)       | 5(33.3)           | -                        |                   |
| KPC                 | 22(71.0)       | 9(29.0)           | -                        |                   |
| NDM+OXA-48-like     | 55(68.8)       | 25(31.3)          | -                        |                   |
| G-neg coinfection   |                |                   |                          | <b>0.019</b>      |

|                                                   |                           |          |          |                 |               |
|---------------------------------------------------|---------------------------|----------|----------|-----------------|---------------|
|                                                   | no                        | 69(76.7) | 21(23.3) | reference       | -             |
|                                                   | yes                       | 39(59.1) | 27(40.9) | 1.75(1.09-2.81) | <b>0.020</b>  |
| <b>G-neg carriage</b>                             |                           |          |          |                 | <b>0.026</b>  |
|                                                   | no                        | 73(72.3) | 28(27.7) | reference       |               |
|                                                   | yes                       | 35(63.6) | 20(36.4) | 1.31(0.81-2.09) | 0.258         |
| <b>G-neg bacteria coinfection and/or carriage</b> |                           |          |          |                 | 0.075         |
|                                                   | <i>Pseudomonas spp.</i>   | 10(62.5) | 6(37.5)  | -               |               |
|                                                   | <i>E.coli</i>             | 9(75.0)  | 3(25.0)  | -               |               |
|                                                   | <i>Acinetobacter spp.</i> | 6(60.0)  | 4(40.0)  | -               |               |
|                                                   | <i>Proteus spp.</i>       | 3(50.0)  | 3(50.0)  | -               |               |
|                                                   | <i>Providencia spp.</i>   | 5(83.3)  | 1(16.7)  | -               |               |
| <b>Comorbid neoplasm</b>                          |                           |          |          |                 | 0.661         |
|                                                   | no                        | 75(68.2) | 35(31.8) | -               |               |
|                                                   | yes                       | 33(71.7) | 13(28.3) | -               |               |
| <b>Comorbid (diabetes mellitus)</b>               |                           |          |          |                 | <b>0.007</b>  |
|                                                   | no                        | 80(76.2) | 25(23.8) | reference       |               |
|                                                   | yes                       | 28(54.9) | 23(45.1) | 1.89(1.19-2.99) | <b>0.006</b>  |
| <b>Transit_urology ward</b>                       |                           |          |          |                 | <b>0.033</b>  |
|                                                   | no                        | 94(66.7) | 47(33.3) | reference       |               |
|                                                   | yes                       | 14(93.3) | 1(6.7)   | 0.10(0.01-0.66) | <b>0.0175</b> |
| <b>Transit surgery or medical specialties</b>     |                           |          |          |                 | 0.305         |
|                                                   | Medical wards             | 29(74.4) | 10(25.6) | -               |               |
|                                                   | Surgery wards             | 56(65.1) | 30(34.9) | -               |               |
| <b>Hospitalisation in the past</b>                |                           |          |          |                 | 0.480         |
|                                                   | no                        | 23(74.2) | 8(25.8)  | -               |               |
|                                                   | yes                       | 90(67.7) | 43(32.3) | -               |               |
| <b>UTI/non UTI*</b>                               |                           |          |          |                 | <b>0.002</b>  |
|                                                   | Non UTI                   | 35(55.6) | 28(44.4) | reference       |               |
|                                                   | UTI                       | 73(78.5) | 20(21.5) | 0.48(0.30-0.77) | <b>0.0014</b> |
| <b>Carbapenem based regimen</b>                   |                           |          |          |                 | 0.058         |
|                                                   | Carbapenem spared         | 47(62.7) | 28(37.3) | reference       |               |
|                                                   | Carbapenem based          | 54(77.1) | 16(22.9) | 0.61(0.36-1.03) | 0.0648        |
| <b>Ceft-Avi based regimen</b>                     |                           |          |          |                 | 0.198         |
|                                                   | Ceft-Avi spared           | 81(72.3) | 31(27.7) | -               |               |
|                                                   | Ceft-Avi based            | 20(60.6) | 13(39.4) | -               |               |
| <b>Colistin based regimen</b>                     |                           |          |          |                 | <b>0.008</b>  |
|                                                   | Colistin -spared          | 60(77.6) | 17(22.1) | reference       |               |
|                                                   | Colistin -based           | 44(57.9) | 32(42.1) | 1.90(1.16-3.13) |               |

\*UTI : urinary tract infection
